# Supplementary material for: VCre/VloxP and SCre/SloxP: new site-specific recombination systems for genome engineering
Source: PubMed Central journal article supplement — Nucleic Acids Res. 2011 Feb 1;39(8):e49. doi: 10.1093/nar/gkq1280 (PMC3082901; doi:10.1093/nar/gkq1280), 2011-02-01
Supplement: supp_gkq1280_Supplementary_Figures_1-10.pdf [file supp_gkq1280_Supplementary_Figures_1-10.pdf]

# Figure S1

```
>tr|A9M500|A9M500_9VIBR Phage integrase family protein.
Length = 380

Score = 115 bits (288), Expect = 5e-24, Method: Compositional matrix adjust.
Identities = 94/321 (29%), Positives = 155/321 (48%), Gaps = 15/321 (4%)

Cre : 25  KNLMDFRDRQA-FSEHTWKMLLSVCRSWAAWCKLNNRKFPAEPEDVRDYLLYLQARGL 83
      ++L++ F+ R+ +S +T + L S + WC N+R PA P+ V + + +A L
VCre: 45  EHLLNEFKKREERYSPNTRLRRLRESAWTCFVDWCLANHRHSLPATPDTVEAFFIE-RAEEL 103

Cre : 84  AVKTIQQHLGQLNMLHRRSGLPRPSDSNAVSLVMRRIRKENVDAGERAKQALAFERTDFD 143
      T+ + ++ +HR +G P P V ++ I ++ V GE KQA F
VCre: 104 HRNTLSVYRWAIISRVRVAGCPDPCLDIYVEDRLKAIARKKVRERGEAVKQASPFNEQHLL 163

Cre : 144 QVRSLEMENSDRCQDIRNLAFLGIAYNTLLRIAIEIARIRVKDISRTDGGRMLIHIGRTKTL 203
      ++ SL SD+ RNLA L +AY ++LR +E+A IRV D+ G ++ I TKT
VCre: 164 KLTSLWYRSDKLLRRNLALLAVAYESMLRASELANIRVSDMELAGDGTAILTIPTIKTN 223

Cre : 204 VSTAGVEKALSGLVTKLVERWISVSGVADDPNNYLCFVRK-NGVAAPSATSQ----- 255
      S LS V L+ + + + +LF V K N P Q
VCre: 224 HSGEPDTCILSQDVVSLMDYTEAGKLDMSDGFVGVSKHNTCIKPKKDKQTGEVLHK 283

Cre : 256 -LSTRALEGIFEATHRLIYGAKDDSGQRYLAWSGHSARVGAARDMARAGVSIPEIMQAGG 314
      ++T+ +EG+F + + D Q ++ HSARVGAA+D+ + G + +I Q+G
VCre: 284 PITTKTVEGVFYSAWETL----DLGRQGVKPFTHASARVGAADLLKGYNTLQIQQSGR 339

Cre : 315 WTNVNIVMNYIRNLDSETGAM 335
      W++ +V Y R + + GAM
VCre: 340 WSSGAMVARYGRAILARDGAM 360
```

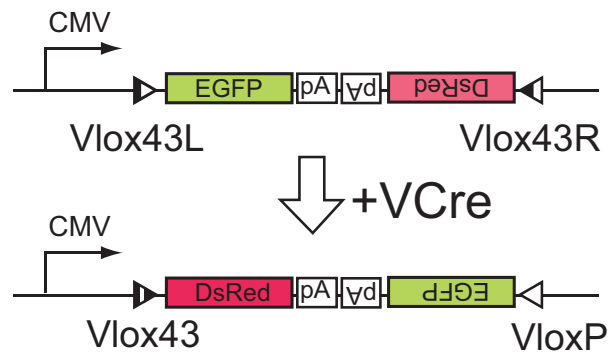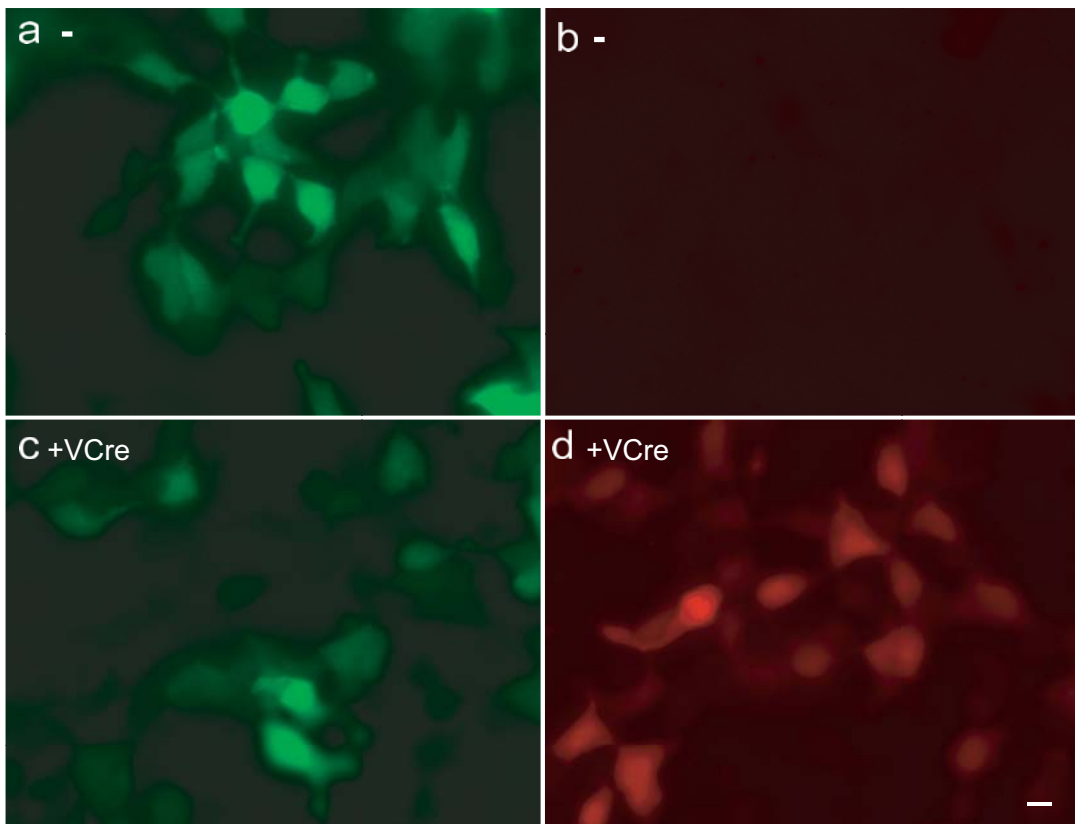

Figure S2

# Figure S3

```
>tr|Q7M0H5|Q7M0H5_CRIGR SubName: Full=Cre recombinase protein;
      Length = 350

Score = 144 bits (362), Expect = 2e-32, Method: Compositional matrix adjust.
Identities = 104/330 (31%), Positives = 174/330 (52%), Gaps = 23/330 (6%)

Socre: 58 EITQAKLKHFLDNGHRTRRA---NTWRALMSRWAKFESWCLTNNLTPLPATPEVVATFIE 114
      + T +++ L + R R+A +TW+ L+S + +WC NN PA PE V ++
Cre : 24 DATSDEVKRNLMDFRDRQAFSEHTWKMLLSVCRSAAWCKLNNRKFPAEPEDVRDYLL 83

Socre: 115 YYQAS--SYTTLsqYAWAINsfHVECGLLSPVSSKTVQDKQNEIRIVKLESGGLAQEQAT 172
      Y QA + T+ Q+ +N H GL P S V IR +++G A+ QA
Cre : 84 YLQARGLAVKTIQqHLGQLNMLHRRSGLPRPSDSNAVSLVMRRIRKENVDAGERAK-QAL 142

Socre: 173 PFRLHHLQMLIESYGESERLLDKRNLALLNIAYESLLRESELLRIKVGHLKSTFEGDYVL 232
      F + S+R D RNLA L IAY +LLR +E+ RI+V + T G ++
Cre : 143 AFERTDFDQVRSLMENSdRCQDIRNLAFLGIAYNTLLRIAETARIRVKDISRTDGGRMLI 202

Socre: 233 SVPYTKT--NDSGEEVVNITPLGF-KLIQRYIQGAGLTKE--DYLFQPIGRSNKVSVOA 287
      + TKT + +G E+ ++ LG KL++R+I +G+ + +YLF + R N V+ +
Cre : 203 HIGRTKTLVSTAGVEKALS---LGVTKLVERWISVSGVADDPNNYLFCRV-RKNGVAAPS 258

Socre: 288 KP--MSTRTVDRVF-----LWAFESLGIDRHSaWSGHSARIGAAQDLAAGYSIAQIQE 339
      +STR ++ +F ++ + R+ AWSGHSAR+GAA+D+ AG SI +I +
Cre : 259 ATSQLSTRALEGIFeATHRLIYGAKDDSGQRYLAWSGHSARVGAARDMARAGVSIPEIMQ 318

Socre: 340 NGRWKSpmMVLRYGKDIKAKESAMAKMLAE 369
      G W + +V+ Y +++ ++ AM ++L +
Cre : 319 AGGWTNVNIVMNYIRnLDSETGAMVRLLED 348
```

```

>tr|A9M500|A9M500_9VIBR SubName: Full=Phage integrase family
protein;
Length = 380

Score = 186 bits (471), Expect = 5e-45, Method: Compositional matrix adjust.
Identities = 122/302 (40%), Positives = 170/302 (56%), Gaps = 16/302 (5%)

Scre: 78 NTWRALMSRWAKFESWCLTNNLTPLPATPEVV-ATFIEYYQASSYTTLSQYAWAINSFHV 136
      NT R L S W F WCL N+ LPATP+ V A FIE + TLS Y WAI+ H
VCre: 61 NTLRRLAESAWTCFVDWCLANHRHSLPATPDTVEAFFIERAEELHRNTLSVYRWAI SRVHR 120

Scre: 137 ECGLLSPVSSKTVQDKQNEIRIVKLESGLAQEQTFFRLHHLQMLIESYGESERLLDKR 196
      G P V+D+ I K+ G A +QA+PF HL L + S++LL +R
VCre: 121 VAGCPDPCLDIYVEDRLKAIARKKVREGE-AVKQASPFNEQHLLKLTSLWYRSKLLRR 179

Scre: 197 NLALLNIAYESLLRESELLRIKVGHLKSTFEGDYVLSVPYTKTNDSGEEVVNITPLGFK 256
      NLALL +AYES+LR SEL I+V ++ +G +L++P TKTN SGE + ++
VCre: 180 NLALLAVAYESMLRASELANIRVSDMELAGDGTAILTIPITKTNHSGEPDTCILSQDVVS 239

Scre: 257 LIQRYIQGAGL--TKEDYLFQPIGRSNKV-----SVQAKPMSTRTVDRVFLWAFE 304
      L+ Y + L + + +LF + + N V KP++T+TV+ VF A+E
VCre: 240 LLM DYTEAGKLDMSDGLFVGVSKHNTCIKPKKDKQTGEVLHKPITTKTVEGVFYS AWE 299

Scre: 305 SLGIDRHS A--WSGHSARIGAAQDLLAAGYSIAQIQENGRWKS PMMVLRYGKDIKAKESA 362
      +L + R ++ HSAR+GAAQDLL GY+ QIQ++GRW S MV RYG+ I A++ A
VCre: 300 TLDLGRQGVKPFHTAHSARVGAQDLLKKGYNLTIQIQSGRWSSGAMVARYGRAILARDGA 359

Scre: 363 MA 364
      MA
VCre: 360 MA 361

```

Figure S4

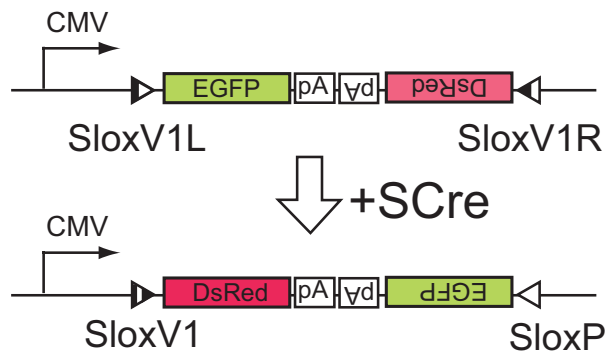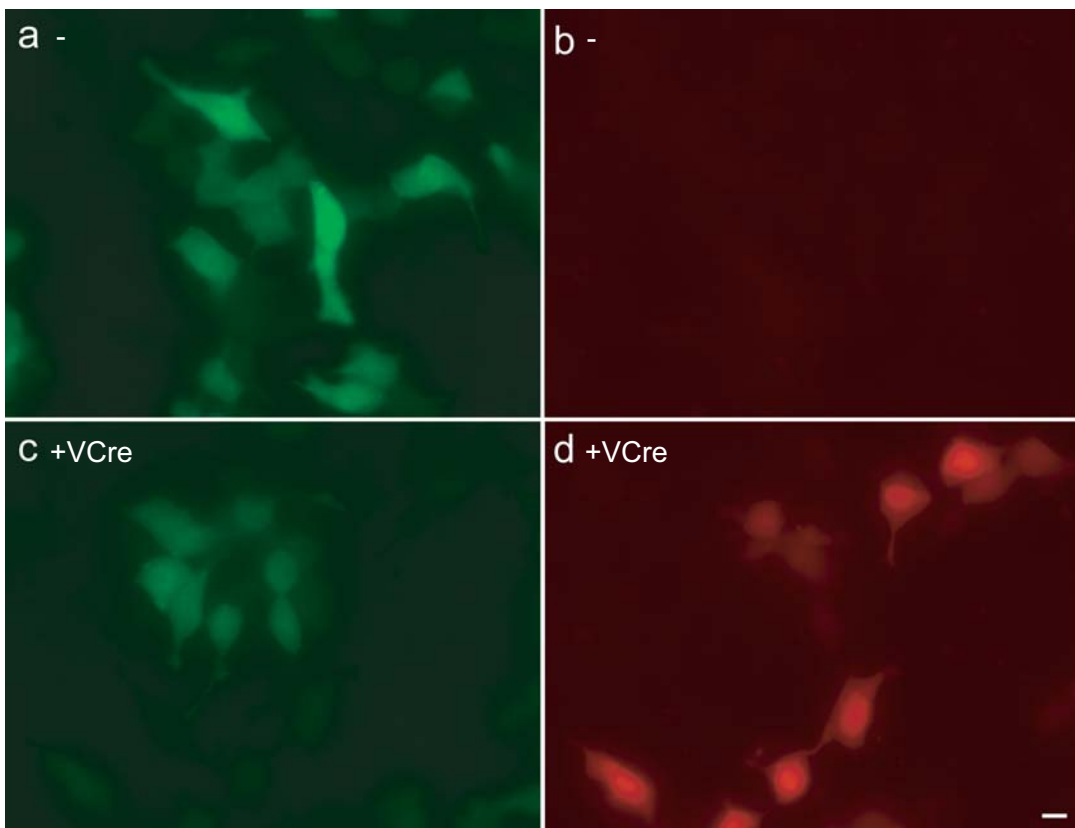

Figure S5

# Genetic modification of both alleles in human cells through four kinds of site-specific recombination systems

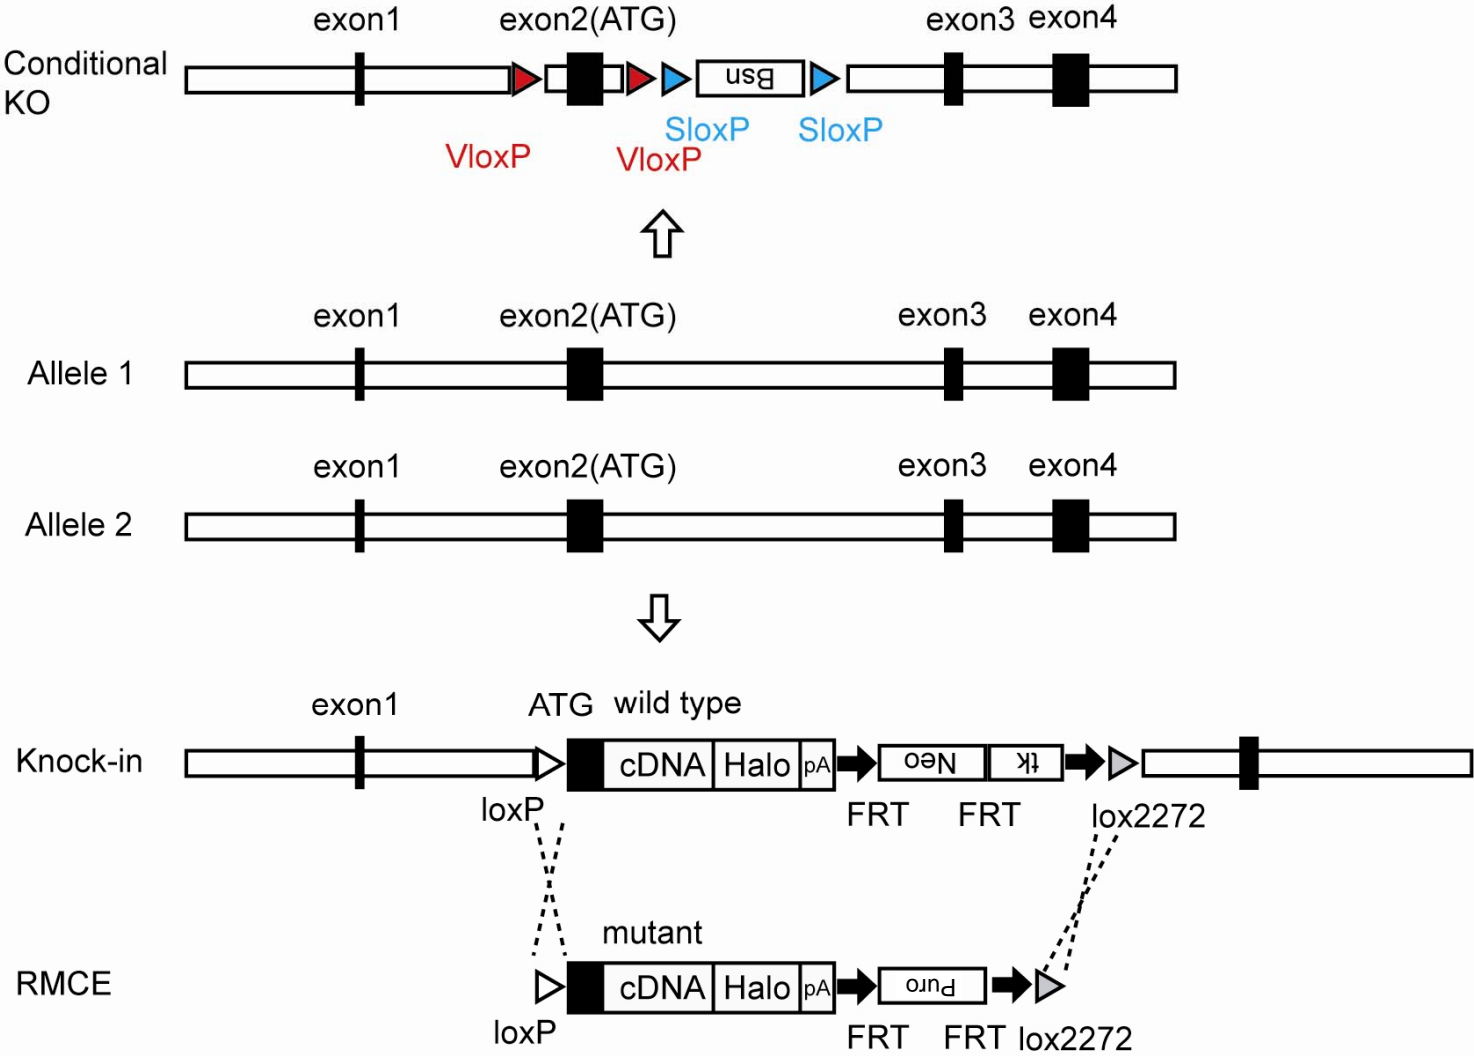

Figure S6

# Exchange of mutant exon or C-terminal tag via multiple site-specific recombination

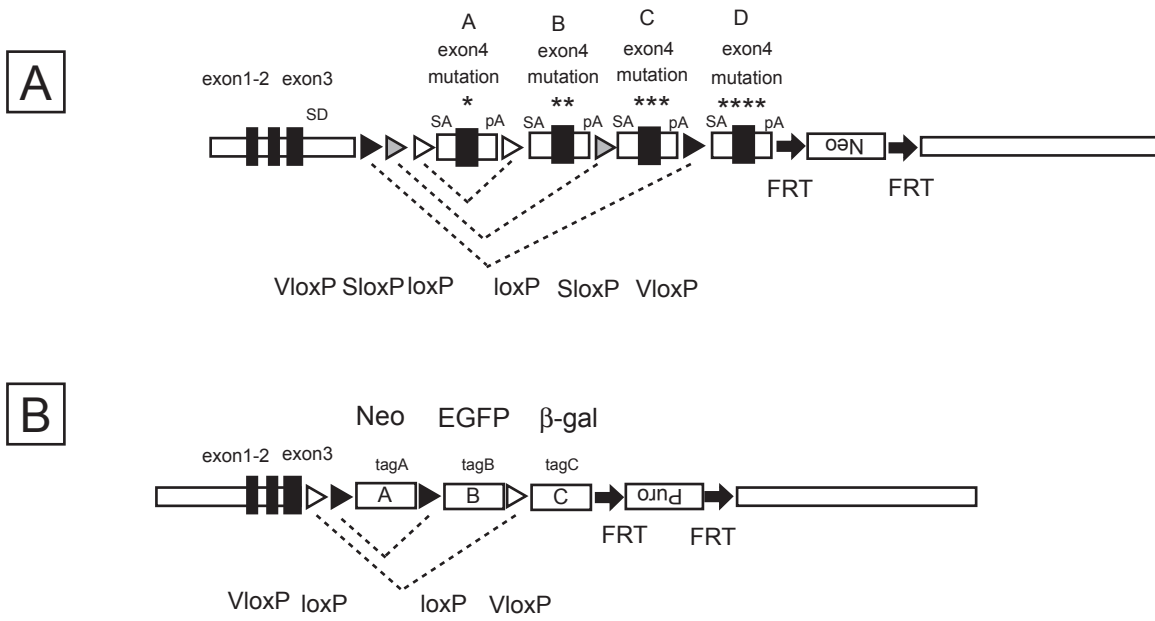

Figure S7

Figure S8

Improving cell or tissue specificity in deleter mice by using a combination of two promoters

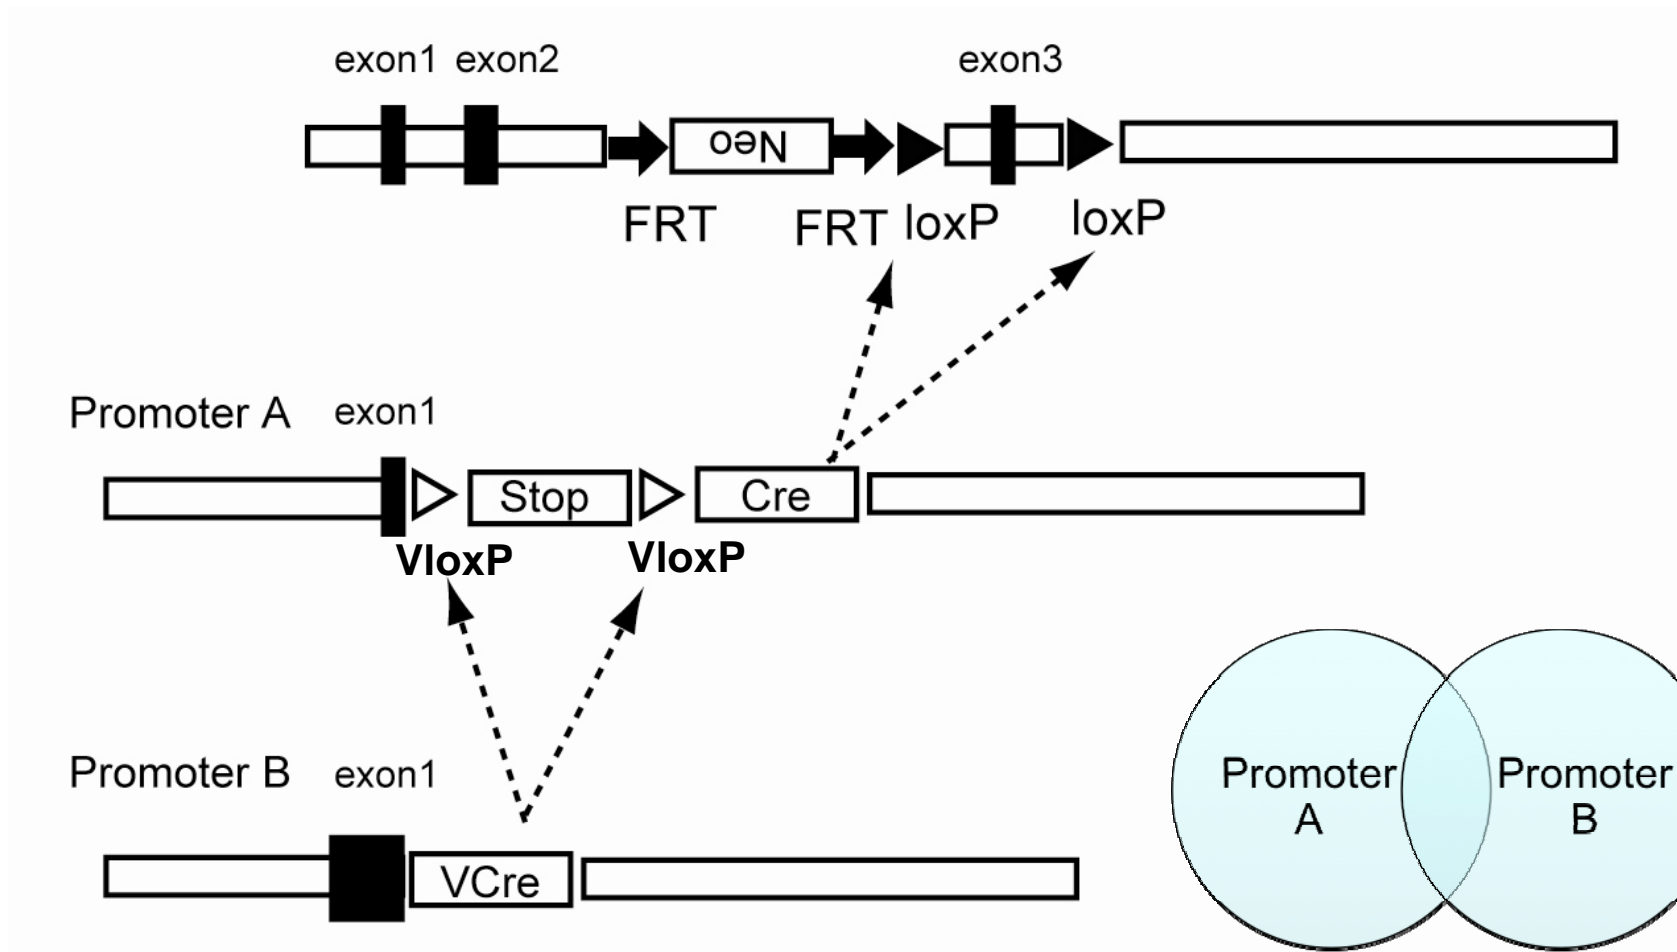



Introducing a foreign expression cassette into a human artificial chromosome (HAC) vector via the VCre/VloxP system and removing the HAC vector via the SCre/CloxP system

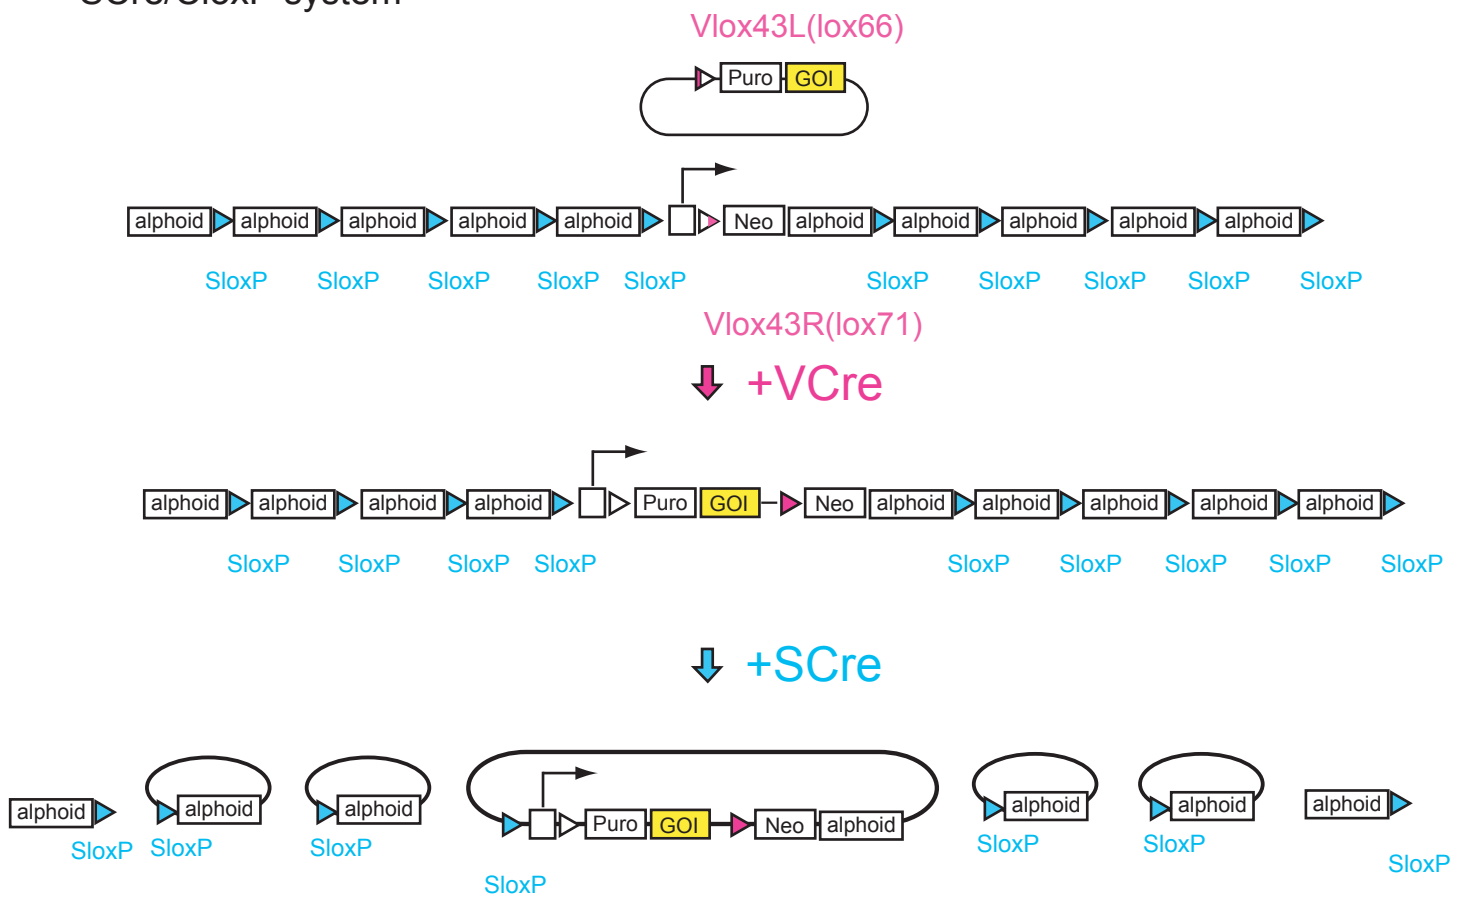

Figure S9

## Double conditional knockout of paralogous or related genes

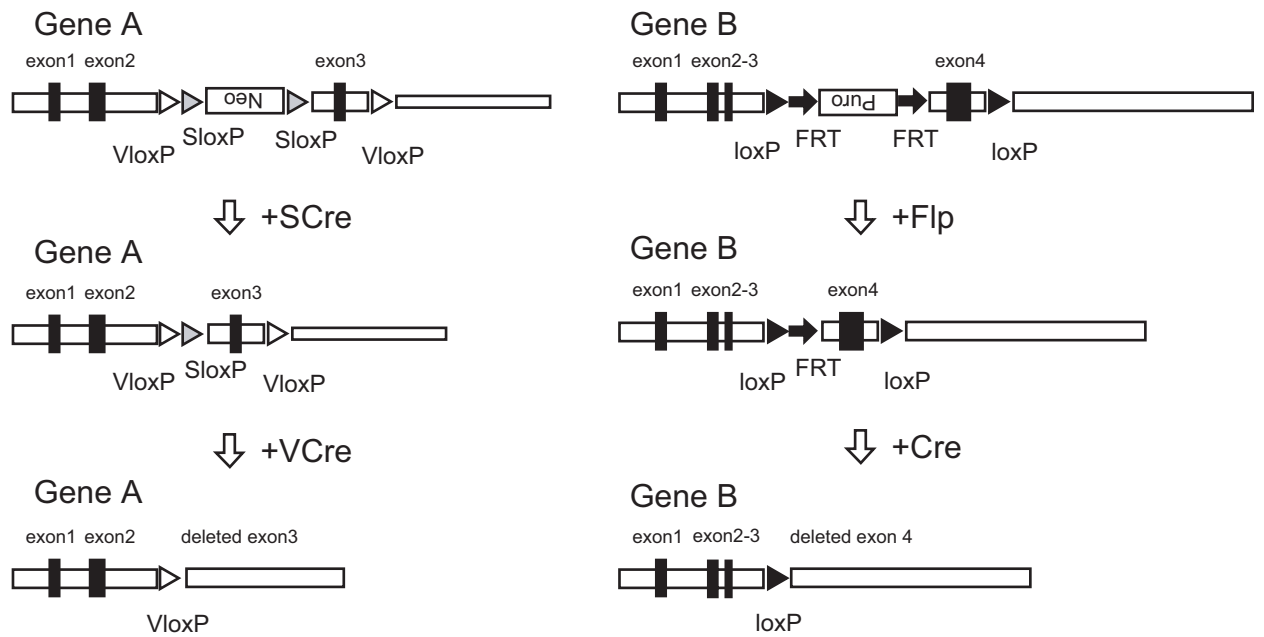

Figure S10
